# Supplementary material for: Modulation of Global Low-Frequency Motions Underlies Allosteric Regulation: Demonstration in CRP/FNR Family Transcription Factors
Source: PubMed Central journal article supplement (PMC3769225; doi:10.1371/journal.pbio.1001651), 2013-09-10
Supplement: pbio.1001651.s010.pdf [file pbio.1001651.s010.pdf]

**Table S2.** Experimental thermodynamic parameters for CAP proteins.

| CAP Protein | $\Delta H_1$<br>(kcal mol <sup>-1</sup> ) | $\Delta H_2$<br>(kcal mol <sup>-1</sup> ) | $\Delta G_1$<br>(kcal mol <sup>-1</sup> ) | $\Delta G_2$<br>(kcal mol <sup>-1</sup> ) | $-T\Delta S_1$<br>(kcal mol <sup>-1</sup> ) | $-T\Delta S_2$<br>(kcal mol <sup>-1</sup> ) |
|-------------|-------------------------------------------|-------------------------------------------|-------------------------------------------|-------------------------------------------|---------------------------------------------|---------------------------------------------|
| Wild type   | -2.0<br>±0.1 (32)                         | 8.2<br>±0.2 (32)                          | -6.9<br>±0.0 (32)                         | -6.6<br>±0.0 (32)                         | -4.9<br>±0.1 (32)                           | -14.8<br>±0.2 (32)                          |
| V132A       | -2.7<br>±0.3 (20)                         | 0.7<br>±0.2 (20)                          | -7.0<br>±0.1 (20)                         | -6.1<br>±0.1 (20)                         | -3.9<br>±0.5 (20)                           | -7.0<br>±0.3 (20)                           |
| V132L       | -1.9<br>±0.1 (17)                         | 6.1<br>±0.1 (17)                          | -7.3<br>±0.0 (17)                         | -7.7<br>±0.0 (17)                         | -5.5<br>±0.1 (17)                           | -13.7<br>±0.1 (17)                          |
| H160L       | -2.9<br>±0.1 (31)                         | 9.8<br>±0.1 (31)                          | -6.8<br>±0.0 (31)                         | -6.6<br>±0.0 (31)                         | -3.9<br>±0.1 (31)                           | -16.4<br>±0.1 (31)                          |
| V140A       | -4.6<br>±0.3 (29)                         | 12.3<br>±0.4 (29)                         | -6.8<br>±0.0 (29)                         | -7.2<br>±0.0 (29)                         | -2.3<br>±0.4 (29)                           | -19.9<br>±0.4 (29)                          |
| V140L       | -2.2<br>±0.1 (27)                         | 7.2<br>±0.1(27)                           | -7.2<br>±0.1 (27)                         | -6.9<br>±0.1 (27)                         | -5.0<br>±0.1 (27)                           | -14.1<br>±0.1 (27)                          |

Mean values ± S.E.M. are given for wild type and mutant CAP for the first and second cAMP binding events. *n* is provided in parentheses.
