# Supplementary material for: Modulation of Global Low-Frequency Motions Underlies Allosteric Regulation: Demonstration in CRP/FNR Family Transcription Factors
Source: PLoS Biol. 2013 Sep 10;11(9):e1001651. doi: 10.1371/journal.pbio.1001651 (PMC3769225; doi:10.1371/journal.pbio.1001651)
Supplement: Table S3 — Experimental thermodynamic parameters for GlxR proteins. (PDF) [file pbio.1001651.s011.pdf]

**Table S3.** Experimental thermodynamic parameters for GlxR proteins.

| CAP<br>Protein | $\Delta H_1$<br>(kcal mol <sup>-1</sup> ) | $\Delta H_2$<br>(kcal mol <sup>-1</sup> ) | $\Delta G_1$<br>(kcal mol <sup>-1</sup> ) | $\Delta G_2$<br>(kcal mol <sup>-1</sup> ) | $-T\Delta S_1$<br>(kcal mol <sup>-1</sup> ) | $-T\Delta S_2$<br>(kcal mol <sup>-1</sup> ) |
|----------------|-------------------------------------------|-------------------------------------------|-------------------------------------------|-------------------------------------------|---------------------------------------------|---------------------------------------------|
| Wild<br>type   | 2.3<br>±0.0 (18)                          | 2.8<br>±0.2(18)                           | -7.4<br>±0.0 (18)                         | -5.7<br>±0.0 (18)                         | -9.7<br>±0.1 (18)                           | -8.5<br>±0.1 (18)                           |
| L134V          | 4.8<br>±0.1 (26)                          | 2.5<br>±0.1 (26)                          | -6.1<br>±0.0 (26)                         | -5.3<br>±0.0 (26)                         | -10.9<br>±0.1 (26)                          | -7.8<br>±0.1 (26)                           |
| A131V          | -3.2<br>±0.1 (30)                         | 1.5<br>±0.1 (30)                          | -6.5<br>±0.1 (30)                         | -5.7<br>±0.1 (30)                         | -3.3<br>±0.1 (30)                           | -7.1<br>±0.1 (30)                           |

Mean values ± S.E.M. are given for wild type and mutant GlxR for the first and second cAMP binding events. *n* is provided in parentheses.
